# Supplementary material
Source: Research Square preprint supplement (doi:10.21203/rs.3.rs-9278584/v1)
Supplement: Supplementary file 1 [file 88a319dfeaf91b3566cf9061.xlsx]

## Sheet: Tabelle1
Supplementary Table 6 | Marker Genes used for Single cell experiment analysis
Top 30 gens in each clusters
Cluster 0	Cluster 1	Cluster 2	Cluster 3	Cluster 4	Cluster 5	Cluster 6	Cluster 7	Cluster 8	Cluster 9	Cluster 10	Cluster 11	Cluster 12	Cluster 13	Cluster 14	Cluster 15	Cluster 16	Cluster 17	Cluster 18	Cluster 19	Cluster 20	Cluster 21	Cluster 22	Cluster 23	Cluster 24	Cluster 25	Cluster 26	Cluster 27	Cluster 28	Cluster 29	Cluster 30	Cluster 31	Cluster 32
FHIT	CCR4	FCGR3A	PI16	LMNA	NOG	GZMH	CD8A	NELL2	KLRG1	IGHD	FOXP3	SC5D	VCAN	FXYD7	SLC7A5	LILRB2	GNLY	GZMK		CD79A	ITGAX	SPI1	TYMS	NRGN	MZB1	ALDH2	PTPRS	CD163	SLC7A5	GZMK	SOX4	SLC4A1
ADTRP	ST8SIA1	GZMB	NEFL	CCR6	ADTRP	FGFBP2	CCL5	FCGBP	KLRC4	FCRL1	RTKN2	HSPA1B	CSF3R	CD8B2	SYTL3	CSF1R	PRF1	KLRG1		MS4A1	TRDC	IFI30	MKI67	PPBP	JCHAIN	CPVL	SERPINF1	ADAMTS2	HSPA1B	MYB	LMO2	HBD
TSHZ2	SGPP2	SPON2	ADAM23	TNFRSF4	EDAR	ADGRG1	FCRL6	CD248	MCOLN2	MS4A1	CTLA4	GPR132	CLEC7A	NEFL	METRNL	HK3	SPON2	LTK		BANK1	NCAM1	S100A8	CDT1	CAVIN2	TXNDC5	SULF2	PLD4	CLEC4E	IL18RAP	FXYD2	PRSS57	HBB
NOG	CHN1	KLRF1	PTGDR2	RORC	ANKRD55	FCRL6	GZMH	CD8B2	PATL2	CD79A	IL2RA	CREM	CD14	PTGDR2	AUTS2	MS4A7	KLRD1	ZBTB16		TNFRSF13C	KLRF1	SERPINA1	STMN1	TUBB1	ITM2C	FCER1A	CLEC4C	JDP2	ASTL	NUCB2	LAPTM4B	HBA2
EDAR	CYP24A1	KLRD1	MYO16	RGS16	KRT72	CCL5	TRGC2	LRRN3	CLDND2	NIBAN3	STAM	DUSP16	MS4A6A	TNFRSF11A	HSPA1B	PLXNB2	GZMB	KLRB1		BLK	KLRD1	CSF1R	MCM4	SPARC	POU2AF1	ZNF385A	NIBAN3	CD14	LTK	HAVCR2	MEIS1	SNCA
ANKRD55	DLGAP1	ADGRG1	CCR8	ACE	MMP28	GNLY	GZMK	NT5E	ASTL	TNFRSF13C	TIGIT	TAMALIN	EMILIN2	ADAM23	SMAD7	SLC11A1	METRNL	IL18RAP		POU2AF1	MAFF	LILRB2	HELLS	GP1BB	DERL3	PLXNB2	IL3RA	CSF3R	PFKFB3	FGFR1	NREP	ALAS2
AK5		TRDC	CDO1	LTK	DACT1	NKG7	EOMES	CRTAM	KIF19	TCL1A	IKZF2	NR4A1	CST3	FXYD2	CCL4	TCF7L2	SYNE1	NCR3		WDFY4	IL18RAP	MS4A7	MCM2	PF4	TNFRSF17	TGFBI	LILRA4	VCAN	ZBTB16	SESTD1	GATA2	AHSP
DACT1		FGFBP2	SEMA5A	CFH	LRRN3	ZNF683	CMC1	S100B	HEATR9	IGHM	DUSP4	ZNF331	TNFAIP2	NRIP3	SLA2	LRRC25	FCGR3A	PLXND1		RALGPS2	GAS7	HDC	RRM2	F13A1	CD79A	EMILIN2	TCF4	SLC11A1	ABCG1	CTLA4	MYB	SPTB
MMP28		SH2D1B	CNTNAP1	HLF	RNF175	PRSS23	LAG3	PCSK1N	RTP5	CD22	CCDC141	HSPH1	SPI1	KRT1	C1orf21	MAFB	KLRF1	PHACTR2		CD79B	GNLY	LRRC25	LMNB1	ITGB3	CPNE5	LMO2	CCDC50	MS4A6A	SYTL3	PRDM8	DIPK1B	ANK1
DSC1		S1PR5	KRT1	TSPAN15	TMEM272	MXRA7	PTMS	TBXA2R	TPRG1	BANK1	F5	HSPA1A	SLC11A1	MAMLD1	MXRA7	EMILIN2	S1PR5	SCART1		OSBPL10	ITGAM	PLXNB2	MCM5	CLU	TNFRSF13B	CSF2RA	BCL11A	IRAK3	IER3	DTHD1	H1-0	EPB42
PDE9A		FCER1G	IL9R	ADAM23	SORCS3	CD8A	CCR5	MMP28	GML	PAX5	TTN	GADD45A	NCF2	ITGA1	CEMIP2	CLEC7A	IL18RAP	RORC		SWAP70	XCL2	HCK	UHRF1	PRKAR2B	TRIB1	KCTD12	MPEG1	FPR1	PLXND1	PGM2L1	DDAH2	TRIM58
RNF175		CLIC3	CCR10	PTPN13	DNAH6	PROK2	CRTAM	DBN1	PROK2	CD79B	GCNT4	HSPD1	MPEG1	CCR8	IL21R	SPI1	MCTP2	SLC4A10		IRF8	MATK	S100A12	FANCI	GNG11	EAF2	HCK	WDFY4	THBS1	SYTL2	POU2AF1	NFE2	HBM
SORCS3		GZMA	IL2	COL5A3	CELA1	IFNG	CD8B2	NPAS2	FAM9C	IRF8	SETD7	PRMT9	HK3	SEMA5A	ENC1	HMOX1	CD300A	CCR5		CIITA	MAP3K8	HK3	TK1	ITGA2B	IGHA1	MNDA	SPIB	SERPINA1	AUTS2	ZBTB32	NPR3	FHDC1
GPRC5B		GNLY	TRIM2	IL4I1	SMARCA1	AGAP1	TNFSF9	CLEC11A	MYO3B	FCER2	SEMA3G	DNAJA4	IFI30	CDO1	SKIL	SERPINA1	NCR1	KIF5C		CD22	CD300A	C1QA	H1-5	MPIG6B	METTL7A	LY86	MZB1	CLEC7A	SLC16A3	PTPN3	ZNRF1	RIPOR3
KLHL29		SYNE1	EDN3	TPPP	GP5	PATL2	CD160	DSEL	PARD6G	CIITA	HPGD	BAG3	TREM1	EDN3	PPP1R16B	NCF2	AOAH	AGAP1		FCRL1	PLA2G6	HMOX1	E2F1	MYL9	SEMA4A	CST3	PACSIN1	MNDA	NR4A3	TIMD4	MED12L	SPTA1
LAMC3		PRF1	CHDH	NTN4	CLDN5	RAB11FIP5	SLC4A4	NRCAM	LCNL1	RALGPS2	LRRC32	SEC14L2	PLXNB2	IL9R	HSPA1A	HCK	CLIC3	FAM43A		PAX5	SH2D1B	CPVL	MCM3	RGS18	IGLC1	SLC8A1	CSF2RB	CSTA	KLRB1	MYL6B	JUP	OSBP2
CACHD1		TBX21	WDR86	ELOVL4	XKRX	OASL	KIAA1671	PTPRK	EPB41L4A	P2RX5	ENTPD1	PMEPA1	S100A8	TMPRSS11E	NR4A3	C5AR1	HAVCR2	TSPAN15		NIBAN3	KLRC3	LILRA5	PCLAF	SH3BGRL2	IRF4	MPEG1	PLXNB2	IL1R2	ZC3H12A	PACSIN1	EGFL7	TNS1
LRRC7		FGR	HRH4	ADAM12	KLHL34	CMKLR1	DBN1	PHGDH	LEXM	BCL11A	ZC2HC1A	DNAJB1	LILRB2	TMEM178B	CREM	LILRA5	SH2D1B	CXCR6		TNFRSF13B	GZMK	TGFBI	PCNA	C2orf88	MYO1D	PHACTR1	EPHA2	NCF2	CEBPD	TOX2	RNF130	FECH
SMARCA1		HOPX	HSF4	B3GALT2	SLC22A31	PTMS	MSC	MEST	VCAM1	WDFY4	SGPP2	TNFRSF4	KCTD12	ZNF462	SH2D2A	CDKN1C	ZBTB16	FLT4		BCL11A	PLCG2	C1QB	NUSAP1	PTGS1	DENND5B	CIITA	CBFA2T3	LILRB2	NR4A1	IL10	EMID1	SELENBP1
C4BPB		MATK	ST6GALNAC1	DAB1	CACHD1	CACNA2D2	TNFRSF9	SFRP5	SH3RF2	HVCN1	IKZF4	LYPD3	LRP1	CDH1	MAFF	CST3	HSH2D	CYTH3		CXCR5	NCR1	ADGRE2	ZWINT	MAP3K7CL	SLAMF7	GSN	TGFBI	TNFAIP2	CCR6	LAYN	SMIM24	HMBS
PLLP		TYROBP	CRLF2	HRH4	PLLP	TMCC3	RTP5	C20orf204	C4orf50	CXCR5	ZBTB32	CCR6	CD300E	VWA7	FOSL2	LST1	ITGAX	ABCB1		P2RX5	TNFRSF11A	TMEM176B	NUDT1	SEPTIN5	GNG7	PAK1	SULF2	EMILIN2	HSPA1A	CAV1	P2RX1	MPP1
FAM83F		CST7	TMEM178B	MATN2	LAMC3	B3GAT1	LGR6	SH3RF3	TNIP3	SWAP70	SELP	S1PR2	TYMP	CYP4F12	SLC1A4	DOCK5	PTGDR	ME1		SPIB	SPTSSB	SLC8A1	TCF19	SNCA	MANEA	FGD2	TNFRSF21	CST3	CDKN1A	PTK7	CD34	RHAG
SLC22A31		METRNL		IL23R	GPRC5B	GPR141	TNIP3	CFAP97D2	SGCD	BLK	CCR8	DNAJB4	PLAUR	CHGB	ELL2	IFI30	CEP78	TRGC1		GNG7	CTSW	FCER1A	CARHSP1	MMD	MAN1A1	PLD4	CST3	LRRK2	ICAM1	SH3RF2	ZNF521	BLVRB
		CX3CR1		KIF26A	ZSCAN23	KIF19	VCAM1	SPEG	STYK1	AFF3	CEACAM4	BTBD19	CEBPD	PDE4C	PLEKHA2	ADGRE2	NMUR1	PLCB1		FGD2	AREG	SIGLEC10	CENPU	TREML1	CD38	PLBD1	IRF8	CD68	CREM	ETV1	CDK6	TMCC2
		CD300A		HSD11B1	ZNF662	ASCL2	RCAN2	ROBO1	EPHX4	FCRL2	TNFRSF9	FRMD4B	S100A9	ALPK2	JMJD6	MPEG1	RNF165	COLQ		PALM2AKAP2	HSH2D	PILRA	EZH2	MPP1	CXXC5	SEMA4A	SCT	SLC7A7	GADD45B	SMIM43	AIF1	YPEL4
		FCRL6		NTRK2		NUAK1	SGCD	GLIS3	TM4SF19	CD83	HACD1	HSPA6	SERPINA1		OASL	CYBB	TSPOAP1	SCRN1		PLCG2	KLRC1	CSF2RA	DTL	TRIM58	SPATS2	RNASE6	IRF4	TIMP2	FURIN	OGN	CBFA2T3	ABCB6
		PLEK		LZTS1		S100B	STYK1	FBLN2		MEF2C	TSHR	ANKRD37	CYBB		FAM177A1	ITGAX	C1orf21	DBN1		MARCHF1	TNFRSF18	SULF2	DHFR	THBS1	MEF2C	CSF3R	ITM2C	MPEG1	FOSL2	GTSF1L	ITM2C	NFE2
		C1orf21		NMU		GPR27	ITGAD	FOXJ1		POU2AF1	RBMS3	TMEM45B	ZNF385A		LPCAT1	SLC8A1	OSBPL5	ADAM12		SEMA4B	GSN	LILRA1	NCAPG2	PGRMC1	TP53INP1	TNFAIP2	DERL3	PLBD1	FAM43A	TACSTD2	BCL11A	CA1
		NCR1		TPBG		SOX13	GATA6	ARHGEF4		LYN	TAFA2	CTSL	CD68		VPS37B	CD68	MYBL1	HPGD		FCRL2	ATP8B4	CD300LF	WDR76	VCL	COBLL1	TIMP2	CCDC88A	ALDH2	IER5	C6orf141	MPP1	ERMAP
		CCL4		TANC1		ZNF365	SLC35G2	MTSS2		PLPP5	LMCD1	PGAP1	MNDA		SYAP1	IRAK3	RAP1GAP2	CCR2		CXXC5	CMC1	LGALS2	SMC4	MFAP3L	NT5DC2	NCF2	JCHAIN	C5AR1	TNF	SLC9A2	CAT	NATD1
