# Supplementary material
Source: Research Square preprint supplement (doi:10.21203/rs.3.rs-9278584/v1)
Supplement: Supplementary file 2 [file e52ed3fdae6baacc71ff9b28.xlsx]

## Sheet: Tabelle1
Supplementary Table 5 | Probes used on the Xenium experiment
Ensembl ID	Gene Symbol	Panel
ENSG00000175899	A2M	Human Immuno-Oncology
ENSG00000130234	ACE2	Human Immuno-Oncology
ENSG00000107796	ACTA2	Human Immuno-Oncology
ENSG00000075624	ACTB	Human Immuno-Oncology
ENSG00000042980	ADAM28	Human Immuno-Oncology
ENSG00000204472	AIF1	Human Immuno-Oncology
ENSG00000160224	AIRE	Human Immuno-Oncology
ENSG00000142208	AKT1	Human Immuno-Oncology
ENSG00000166825	ANPEP	Human Immuno-Oncology
ENSG00000135046	ANXA1	Human Immuno-Oncology
ENSG00000130203	APOE	Human Immuno-Oncology
ENSG00000109321	AREG	Human Immuno-Oncology
ENSG00000118520	ARG1	Human Immuno-Oncology
ENSG00000117713	ARID1A	Human Immuno-Oncology
ENSG00000111229	ARPC3	Human Immuno-Oncology
ENSG00000162704	ARPC5	Human Immuno-Oncology
ENSG00000149311	ATM	Human Immuno-Oncology
ENSG00000153064	BANK1	Human Immuno-Oncology
ENSG00000123685	BATF3	Human Immuno-Oncology
ENSG00000171791	BCL2	Human Immuno-Oncology
ENSG00000157764	BRAF	Human Immuno-Oncology
ENSG00000173369	C1QB	Human Immuno-Oncology
ENSG00000108561	C1QBP	Human Immuno-Oncology
ENSG00000159403	C1R	Human Immuno-Oncology
ENSG00000182326	C1S	Human Immuno-Oncology
ENSG00000172156	CCL11	Human Immuno-Oncology
ENSG00000181374	CCL13	Human Immuno-Oncology
ENSG00000276409	CCL14	Human Immuno-Oncology
ENSG00000275718	CCL15	Human Immuno-Oncology
ENSG00000275152	CCL16	Human Immuno-Oncology
ENSG00000172724	CCL19	Human Immuno-Oncology
ENSG00000108691	CCL2	Human Immuno-Oncology
ENSG00000115009	CCL20	Human Immuno-Oncology
ENSG00000137077	CCL21	Human Immuno-Oncology
ENSG00000006606	CCL26	Human Immuno-Oncology
ENSG00000151882	CCL28	Human Immuno-Oncology
ENSG00000277632	CCL3	Human Immuno-Oncology
ENSG00000276085	CCL3L1	Human Immuno-Oncology
ENSG00000275302	CCL4	Human Immuno-Oncology
ENSG00000271503	CCL5	Human Immuno-Oncology
ENSG00000108688	CCL7	Human Immuno-Oncology
ENSG00000108700	CCL8	Human Immuno-Oncology
ENSG00000110092	CCND1	Human Immuno-Oncology
ENSG00000163823	CCR1	Human Immuno-Oncology
ENSG00000121807	CCR2	Human Immuno-Oncology
ENSG00000183625	CCR3	Human Immuno-Oncology
ENSG00000183813	CCR4	Human Immuno-Oncology
ENSG00000160791	CCR5	Human Immuno-Oncology
ENSG00000112486	CCR6	Human Immuno-Oncology
ENSG00000126353	CCR7	Human Immuno-Oncology
ENSG00000170458	CD14	Human Immuno-Oncology
ENSG00000177575	CD163	Human Immuno-Oncology
ENSG00000177455	CD19	Human Immuno-Oncology
ENSG00000158477	CD1A	Human Immuno-Oncology
ENSG00000158481	CD1C	Human Immuno-Oncology
ENSG00000116824	CD2	Human Immuno-Oncology
ENSG00000198821	CD247	Human Immuno-Oncology
ENSG00000139193	CD27	Human Immuno-Oncology
ENSG00000120217	CD274	Human Immuno-Oncology
ENSG00000103855	CD276	Human Immuno-Oncology
ENSG00000178562	CD28	Human Immuno-Oncology
ENSG00000104894	CD37	Human Immuno-Oncology
ENSG00000004468	CD38	Human Immuno-Oncology
ENSG00000167286	CD3D	Human Immuno-Oncology
ENSG00000198851	CD3E	Human Immuno-Oncology
ENSG00000010610	CD4	Human Immuno-Oncology
ENSG00000101017	CD40	Human Immuno-Oncology
ENSG00000102245	CD40LG	Human Immuno-Oncology
ENSG00000026508	CD44	Human Immuno-Oncology
ENSG00000196776	CD47	Human Immuno-Oncology
ENSG00000129226	CD68	Human Immuno-Oncology
ENSG00000019582	CD74	Human Immuno-Oncology
ENSG00000105369	CD79A	Human Immuno-Oncology
ENSG00000007312	CD79B	Human Immuno-Oncology
ENSG00000121594	CD80	Human Immuno-Oncology
ENSG00000112149	CD83	Human Immuno-Oncology
ENSG00000114013	CD86	Human Immuno-Oncology
ENSG00000153563	CD8A	Human Immuno-Oncology
ENSG00000172116	CD8B	Human Immuno-Oncology
ENSG00000170312	CDK1	Human Immuno-Oncology
ENSG00000167258	CDK12	Human Immuno-Oncology
ENSG00000123374	CDK2	Human Immuno-Oncology
ENSG00000135446	CDK4	Human Immuno-Oncology
ENSG00000105810	CDK6	Human Immuno-Oncology
ENSG00000124762	CDKN1A	Human Immuno-Oncology
ENSG00000111276	CDKN1B	Human Immuno-Oncology
ENSG00000129757	CDKN1C	Human Immuno-Oncology
ENSG00000147889	CDKN2A	Human Immuno-Oncology
ENSG00000147883	CDKN2B	Human Immuno-Oncology
ENSG00000123080	CDKN2C	Human Immuno-Oncology
ENSG00000129355	CDKN2D	Human Immuno-Oncology
ENSG00000113722	CDX1	Human Immuno-Oncology
ENSG00000165556	CDX2	Human Immuno-Oncology
ENSG00000079385	CEACAM1	Human Immuno-Oncology
ENSG00000086548	CEACAM6	Human Immuno-Oncology
ENSG00000124469	CEACAM8	Human Immuno-Oncology
ENSG00000117724	CENPF	Human Immuno-Oncology
ENSG00000166582	CENPV	Human Immuno-Oncology
ENSG00000136698	CFC1	Human Immuno-Oncology
ENSG00000133063	CHIT1	Human Immuno-Oncology
ENSG00000132514	CLEC10A	Human Immuno-Oncology
ENSG00000172322	CLEC12A	Human Immuno-Oncology
ENSG00000174600	CMKLR1	Human Immuno-Oncology
ENSG00000102879	CORO1A	Human Immuno-Oncology
ENSG00000103187	COTL1	Human Immuno-Oncology
ENSG00000163751	CPA3	Human Immuno-Oncology
ENSG00000184371	CSF1	Human Immuno-Oncology
ENSG00000182578	CSF1R	Human Immuno-Oncology
ENSG00000077984	CST7	Human Immuno-Oncology
ENSG00000163599	CTLA4	Human Immuno-Oncology
ENSG00000168036	CTNNB1	Human Immuno-Oncology
ENSG00000164733	CTSB	Human Immuno-Oncology
ENSG00000117984	CTSD	Human Immuno-Oncology
ENSG00000135047	CTSL	Human Immuno-Oncology
ENSG00000163131	CTSS	Human Immuno-Oncology
ENSG00000172543	CTSW	Human Immuno-Oncology
ENSG00000168329	CX3CR1	Human Immuno-Oncology
ENSG00000163739	CXCL1	Human Immuno-Oncology
ENSG00000169245	CXCL10	Human Immuno-Oncology
ENSG00000169248	CXCL11	Human Immuno-Oncology
ENSG00000107562	CXCL12	Human Immuno-Oncology
ENSG00000156234	CXCL13	Human Immuno-Oncology
ENSG00000145824	CXCL14	Human Immuno-Oncology
ENSG00000161921	CXCL16	Human Immuno-Oncology
ENSG00000081041	CXCL2	Human Immuno-Oncology
ENSG00000163734	CXCL3	Human Immuno-Oncology
ENSG00000163735	CXCL5	Human Immuno-Oncology
ENSG00000124875	CXCL6	Human Immuno-Oncology
ENSG00000138755	CXCL9	Human Immuno-Oncology
ENSG00000163464	CXCR1	Human Immuno-Oncology
ENSG00000180871	CXCR2	Human Immuno-Oncology
ENSG00000186810	CXCR3	Human Immuno-Oncology
ENSG00000121966	CXCR4	Human Immuno-Oncology
ENSG00000160683	CXCR5	Human Immuno-Oncology
ENSG00000172215	CXCR6	Human Immuno-Oncology
ENSG00000011465	DCN	Human Immuno-Oncology
ENSG00000099958	DERL3	Human Immuno-Oncology
ENSG00000065357	DGKA	Human Immuno-Oncology
ENSG00000187908	DMBT1	Human Immuno-Oncology
ENSG00000158050	DUSP2	Human Immuno-Oncology
ENSG00000138798	EGF	Human Immuno-Oncology
ENSG00000146648	EGFR	Human Immuno-Oncology
ENSG00000179388	EGR3	Human Immuno-Oncology
ENSG00000138185	ENTPD1	Human Immuno-Oncology
ENSG00000163508	EOMES	Human Immuno-Oncology
ENSG00000119888	EPCAM	Human Immuno-Oncology
ENSG00000130427	EPO	Human Immuno-Oncology
ENSG00000187266	EPOR	Human Immuno-Oncology
ENSG00000141736	ERBB2	Human Immuno-Oncology
ENSG00000065361	ERBB3	Human Immuno-Oncology
ENSG00000178568	ERBB4	Human Immuno-Oncology
ENSG00000091831	ESR1	Human Immuno-Oncology
ENSG00000121769	FABP3	Human Immuno-Oncology
ENSG00000168040	FADD	Human Immuno-Oncology
ENSG00000026103	FAS	Human Immuno-Oncology
ENSG00000117560	FASLG	Human Immuno-Oncology
ENSG00000179639	FCER1A	Human Immuno-Oncology
ENSG00000104921	FCER2	Human Immuno-Oncology
ENSG00000150337	FCGR1A	Human Immuno-Oncology
ENSG00000143226	FCGR2A	Human Immuno-Oncology
ENSG00000072694	FCGR2B	Human Immuno-Oncology
ENSG00000203747	FCGR3A	Human Immuno-Oncology
ENSG00000162894	FCMR	Human Immuno-Oncology
ENSG00000160856	FCRL3	Human Immuno-Oncology
ENSG00000149557	FEZ1	Human Immuno-Oncology
ENSG00000138685	FGF2	Human Immuno-Oncology
ENSG00000000938	FGR	Human Immuno-Oncology
ENSG00000189283	FHIT	Human Immuno-Oncology
ENSG00000134285	FKBP11	Human Immuno-Oncology
ENSG00000102755	FLT1	Human Immuno-Oncology
ENSG00000090554	FLT3LG	Human Immuno-Oncology
ENSG00000115414	FN1	Human Immuno-Oncology
ENSG00000170345	FOS	Human Immuno-Oncology
ENSG00000049768	FOXP3	Human Immuno-Oncology
ENSG00000123689	G0S2	Human Immuno-Oncology
ENSG00000179348	GATA2	Human Immuno-Oncology
ENSG00000107485	GATA3	Human Immuno-Oncology
ENSG00000122694	GLIPR2	Human Immuno-Oncology
ENSG00000115523	GNLY	Human Immuno-Oncology
ENSG00000174946	GPR171	Human Immuno-Oncology
ENSG00000169508	GPR183	Human Immuno-Oncology
ENSG00000171659	GPR34	Human Immuno-Oncology
ENSG00000145649	GZMA	Human Immuno-Oncology
ENSG00000100453	GZMB	Human Immuno-Oncology
ENSG00000100450	GZMH	Human Immuno-Oncology
ENSG00000113088	GZMK	Human Immuno-Oncology
ENSG00000135077	HAVCR2	Human Immuno-Oncology
ENSG00000100644	HIF1A	Human Immuno-Oncology
ENSG00000234745	HLA-B	Human Immuno-Oncology
ENSG00000163106	HPGDS	Human Immuno-Oncology
ENSG00000090339	ICAM1	Human Immuno-Oncology
ENSG00000160223	ICOSLG	Human Immuno-Oncology
ENSG00000125968	ID1	Human Immuno-Oncology
ENSG00000115738	ID2	Human Immuno-Oncology
ENSG00000172201	ID4	Human Immuno-Oncology
ENSG00000131203	IDO1	Human Immuno-Oncology
ENSG00000119922	IFIT2	Human Immuno-Oncology
ENSG00000119917	IFIT3	Human Immuno-Oncology
ENSG00000142089	IFITM3	Human Immuno-Oncology
ENSG00000142166	IFNAR1	Human Immuno-Oncology
ENSG00000171855	IFNB1	Human Immuno-Oncology
ENSG00000027697	IFNGR1	Human Immuno-Oncology
ENSG00000182393	IFNL1	Human Immuno-Oncology
ENSG00000163453	IGFBP7	Human Immuno-Oncology
ENSG00000211896	IGHG1	Human Immuno-Oncology
ENSG00000211893	IGHG2	Human Immuno-Oncology
ENSG00000211897	IGHG3	Human Immuno-Oncology
ENSG00000211892	IGHG4	Human Immuno-Oncology
ENSG00000253755	IGHGP	Human Immuno-Oncology
ENSG00000211899	IGHM	Human Immuno-Oncology
ENSG00000211899	IGHM	Human Immuno-Oncology
ENSG00000211679	IGLC3	Human Immuno-Oncology
ENSG00000136634	IL10	Human Immuno-Oncology
ENSG00000110324	IL10RA	Human Immuno-Oncology
ENSG00000113302	IL12B	Human Immuno-Oncology
ENSG00000081985	IL12RB2	Human Immuno-Oncology
ENSG00000169194	IL13	Human Immuno-Oncology
ENSG00000123496	IL13RA2	Human Immuno-Oncology
ENSG00000164136	IL15	Human Immuno-Oncology
ENSG00000134470	IL15RA	Human Immuno-Oncology
ENSG00000150782	IL18	Human Immuno-Oncology
ENSG00000115008	IL1A	Human Immuno-Oncology
ENSG00000125538	IL1B	Human Immuno-Oncology
ENSG00000115594	IL1R1	Human Immuno-Oncology
ENSG00000196083	IL1RAP	Human Immuno-Oncology
ENSG00000109471	IL2	Human Immuno-Oncology
ENSG00000142677	IL22RA1	Human Immuno-Oncology
ENSG00000164485	IL22RA2	Human Immuno-Oncology
ENSG00000110944	IL23A	Human Immuno-Oncology
ENSG00000134460	IL2RA	Human Immuno-Oncology
ENSG00000100385	IL2RB	Human Immuno-Oncology
ENSG00000147168	IL2RG	Human Immuno-Oncology
ENSG00000113520	IL4	Human Immuno-Oncology
ENSG00000077238	IL4R	Human Immuno-Oncology
ENSG00000113525	IL5	Human Immuno-Oncology
ENSG00000136244	IL6	Human Immuno-Oncology
ENSG00000168685	IL7R	Human Immuno-Oncology
ENSG00000145703	IQGAP2	Human Immuno-Oncology
ENSG00000125347	IRF1	Human Immuno-Oncology
ENSG00000168310	IRF2	Human Immuno-Oncology
ENSG00000126456	IRF3	Human Immuno-Oncology
ENSG00000137265	IRF4	Human Immuno-Oncology
ENSG00000128604	IRF5	Human Immuno-Oncology
ENSG00000140968	IRF8	Human Immuno-Oncology
ENSG00000187608	ISG15	Human Immuno-Oncology
ENSG00000213949	ITGA1	Human Immuno-Oncology
ENSG00000083457	ITGAE	Human Immuno-Oncology
ENSG00000169896	ITGAM	Human Immuno-Oncology
ENSG00000140678	ITGAX	Human Immuno-Oncology
ENSG00000162434	JAK1	Human Immuno-Oncology
ENSG00000096968	JAK2	Human Immuno-Oncology
ENSG00000105639	JAK3	Human Immuno-Oncology
ENSG00000132465	JCHAIN	Human Immuno-Oncology
ENSG00000177606	JUN	Human Immuno-Oncology
ENSG00000171223	JUNB	Human Immuno-Oncology
ENSG00000157404	KIT	Human Immuno-Oncology
ENSG00000111796	KLRB1	Human Immuno-Oncology
ENSG00000134545	KLRC1	Human Immuno-Oncology
ENSG00000134539	KLRD1	Human Immuno-Oncology
ENSG00000150045	KLRF1	Human Immuno-Oncology
ENSG00000213809	KLRK1	Human Immuno-Oncology
ENSG00000055609	KMT2C	Human Immuno-Oncology
ENSG00000133703	KRAS	Human Immuno-Oncology
ENSG00000089692	LAG3	Human Immuno-Oncology
ENSG00000185896	LAMP1	Human Immuno-Oncology
ENSG00000005893	LAMP2	Human Immuno-Oncology
ENSG00000078081	LAMP3	Human Immuno-Oncology
ENSG00000182866	LCK	Human Immuno-Oncology
ENSG00000128342	LIF	Human Immuno-Oncology
ENSG00000239961	LILRA4	Human Immuno-Oncology
ENSG00000187116	LILRA5	Human Immuno-Oncology
ENSG00000131042	LILRB2	Human Immuno-Oncology
ENSG00000186818	LILRB4	Human Immuno-Oncology
ENSG00000227507	LTB	Human Immuno-Oncology
ENSG00000139329	LUM	Human Immuno-Oncology
ENSG00000160932	LY6E	Human Immuno-Oncology
ENSG00000019169	MARCO	Human Immuno-Oncology
ENSG00000183019	MCEMP1	Human Immuno-Oncology
ENSG00000105976	MET	Human Immuno-Oncology
ENSG00000111341	MGP	Human Immuno-Oncology
ENSG00000129534	MIS18BP1	Human Immuno-Oncology
ENSG00000148773	MKI67	Human Immuno-Oncology
ENSG00000262406	MMP12	Human Immuno-Oncology
ENSG00000100985	MMP9	Human Immuno-Oncology
ENSG00000197629	MPEG1	Human Immuno-Oncology
ENSG00000156738	MS4A1	Human Immuno-Oncology
ENSG00000149534	MS4A2	Human Immuno-Oncology
ENSG00000215182	MUC5AC	Human Immuno-Oncology
ENSG00000157601	MX1	Human Immuno-Oncology
ENSG00000172936	MYD88	Human Immuno-Oncology
ENSG00000170476	MZB1	Human Immuno-Oncology
ENSG00000149294	NCAM1	Human Immuno-Oncology
ENSG00000144959	NCEH1	Human Immuno-Oncology
ENSG00000184613	NELL2	Human Immuno-Oncology
ENSG00000196712	NF1	Human Immuno-Oncology
ENSG00000105374	NKG7	Human Immuno-Oncology
ENSG00000106100	NOD1	Human Immuno-Oncology
ENSG00000142546	NOSIP	Human Immuno-Oncology
ENSG00000148400	NOTCH1	Human Immuno-Oncology
ENSG00000134250	NOTCH2	Human Immuno-Oncology
ENSG00000074181	NOTCH3	Human Immuno-Oncology
ENSG00000135318	NT5E	Human Immuno-Oncology
ENSG00000091651	ORC6	Human Immuno-Oncology
ENSG00000108405	P2RX1	Human Immuno-Oncology
ENSG00000196092	PAX5	Human Immuno-Oncology
ENSG00000188389	PDCD1	Human Immuno-Oncology
ENSG00000197646	PDCD1LG2	Human Immuno-Oncology
ENSG00000134853	PDGFRA	Human Immuno-Oncology
ENSG00000256713	PGA5	Human Immuno-Oncology
ENSG00000121879	PIK3CA	Human Immuno-Oncology
ENSG00000146070	PLA2G7	Human Immuno-Oncology
ENSG00000166428	PLD4	Human Immuno-Oncology
ENSG00000115956	PLEK	Human Immuno-Oncology
ENSG00000130300	PLVAP	Human Immuno-Oncology
ENSG00000123131	PRDX4	Human Immuno-Oncology
ENSG00000180644	PRF1	Human Immuno-Oncology
ENSG00000205220	PSMB10	Human Immuno-Oncology
ENSG00000171862	PTEN	Human Immuno-Oncology
ENSG00000095303	PTGS1	Human Immuno-Oncology
ENSG00000081237	PTPRC	Human Immuno-Oncology
ENSG00000139687	RB1	Human Immuno-Oncology
ENSG00000134193	REG4	Human Immuno-Oncology
ENSG00000090104	RGS1	Human Immuno-Oncology
ENSG00000143248	RGS5	Human Immuno-Oncology
ENSG00000108375	RNF43	Human Immuno-Oncology
ENSG00000143365	RORC	Human Immuno-Oncology
ENSG00000020633	RUNX3	Human Immuno-Oncology
ENSG00000163220	S100A9	Human Immuno-Oncology
ENSG00000160307	S100B	Human Immuno-Oncology
ENSG00000164483	SAMD3	Human Immuno-Oncology
ENSG00000115884	SDC1	Human Immuno-Oncology
ENSG00000188404	SELL	Human Immuno-Oncology
ENSG00000079215	SLC1A3	Human Immuno-Oncology
ENSG00000166949	SMAD3	Human Immuno-Oncology
ENSG00000185338	SOCS1	Human Immuno-Oncology
ENSG00000120833	SOCS2	Human Immuno-Oncology
ENSG00000184557	SOCS3	Human Immuno-Oncology
ENSG00000115904	SOS1	Human Immuno-Oncology
ENSG00000164736	SOX17	Human Immuno-Oncology
ENSG00000125398	SOX9	Human Immuno-Oncology
ENSG00000113140	SPARC	Human Immuno-Oncology
ENSG00000152583	SPARCL1	Human Immuno-Oncology
ENSG00000269404	SPIB	Human Immuno-Oncology
ENSG00000159674	SPON2	Human Immuno-Oncology
ENSG00000180879	SSR4	Human Immuno-Oncology
ENSG00000115415	STAT1	Human Immuno-Oncology
ENSG00000170581	STAT2	Human Immuno-Oncology
ENSG00000168610	STAT3	Human Immuno-Oncology
ENSG00000138378	STAT4	Human Immuno-Oncology
ENSG00000173757	STAT5B	Human Immuno-Oncology
ENSG00000166888	STAT6	Human Immuno-Oncology
ENSG00000117632	STMN1	Human Immuno-Oncology
ENSG00000165025	SYK	Human Immuno-Oncology
ENSG00000073861	TBX21	Human Immuno-Oncology
ENSG00000165929	TC2N	Human Immuno-Oncology
ENSG00000081059	TCF7	Human Immuno-Oncology
ENSG00000100721	TCL1A	Human Immuno-Oncology
ENSG00000160180	TFF3	Human Immuno-Oncology
ENSG00000105329	TGFB1	Human Immuno-Oncology
ENSG00000181847	TIGIT	Human Immuno-Oncology
ENSG00000184012	TMPRSS2	Human Immuno-Oncology
ENSG00000232810	TNF	Human Immuno-Oncology
ENSG00000159958	TNFRSF13C	Human Immuno-Oncology
ENSG00000048462	TNFRSF17	Human Immuno-Oncology
ENSG00000028137	TNFRSF1B	Human Immuno-Oncology
ENSG00000049249	TNFRSF9	Human Immuno-Oncology
ENSG00000198846	TOX	Human Immuno-Oncology
ENSG00000141510	TP53	Human Immuno-Oncology
ENSG00000163519	TRAT1	Human Immuno-Oncology
ENSG00000095970	TREM2	Human Immuno-Oncology
ENSG00000123416	TUBA1B	Human Immuno-Oncology
ENSG00000196230	TUBB	Human Immuno-Oncology
ENSG00000084652	TXLNA	Human Immuno-Oncology
ENSG00000175063	UBE2C	Human Immuno-Oncology
ENSG00000038427	VCAN	Human Immuno-Oncology
ENSG00000112715	VEGFA	Human Immuno-Oncology
ENSG00000155659	VSIG4	Human Immuno-Oncology
ENSG00000107738	VSIR	Human Immuno-Oncology
ENSG00000100219	XBP1	Human Immuno-Oncology
ENSG00000176083	ZNF683	Human Immuno-Oncology
ENSG00000120215	MLANA	Add-on
ENSG00000185664	PMEL	Add-on
ENSG00000185686	PRAME	Add-on
ENSG00000100146	SOX10	Add-on
ENSG00000187098	MITF	Add-on
ENSG00000049130	KITLG	Add-on
ENSG00000064300	NGFR	Add-on
ENSG00000160678	S100A1	Add-on
ENSG00000071991	CDH19	Add-on
ENSG00000154096	THY1	Add-on
ENSG00000196628	TCF4	Add-on
ENSG00000068323	TFE3	Add-on
ENSG00000110492	MDK	Add-on
ENSG00000105894	PTN	Add-on
ENSG00000124214	STAU1	Add-on
ENSG00000145833	DDX46	Add-on
ENSG00000068383	INPP5A	Add-on
ENSG00000156052	GNAQ	Add-on
ENSG00000088256	GNA11	Add-on
ENSG00000152207	CYSLTR2	Add-on
ENSG00000101333	PLCB4	Add-on
ENSG00000173674	EIF1AX	Add-on
ENSG00000139618	BRCA2	Add-on
ENSG00000163930	BAP1	Add-on
ENSG00000115524	SF3B1	Add-on
ENSG00000161547	SRSF2	Add-on
ENSG00000135914	HTR2B	Add-on
ENSG00000169855	ROBO1	Add-on
ENSG00000175745	NR2F1	Add-on
ENSG00000144659	SLC25A38	Add-on
ENSG00000007062	PROM1	Add-on
ENSG00000077092	RARB	Add-on
ENSG00000135480	KRT7	Add-on
ENSG00000108821	COL1A1	Add-on
ENSG00000110876	SELPLG	Add-on
ENSG00000170989	S1PR1	Add-on
ENSG00000180739	S1PR5	Add-on
ENSG00000110848	CD69	Add-on
ENSG00000171346	KRT15	Add-on
ENSG00000128422	KRT17	Add-on
ENSG00000112115	IL17A	Add-on
ENSG00000163600	ICOS	Add-on
ENSG00000131724	IL13RA1	Add-on
ENSG00000204671	IL31	Add-on
ENSG00000164509	IL31RA	Add-on
ENSG00000138772	ANXA3	Add-on
ENSG00000149212	SESN3	Add-on
ENSG00000087448	KLHL42	Add-on
ENSG00000197959	DNM3	Add-on
ENSG00000165434	PGM2L1	Add-on
ENSG00000173762	CD7	Add-on
ENSG00000197635	DPP4	Add-on
ENSG00000104490	NCALD	Add-on
ENSG00000154277	UCHL1	Add-on
ENSG00000145623	OSMR	Add-on
ENSG00000048052	HDAC9	Add-on
ENSG00000240403	KIR3DL2	Add-on
ENSG00000120949	TNFRSF8	Add-on
ENSG00000111537	IFNG	Add-on
ENSG00000196549	MME	Add-on
ENSG00000211751	TRBC1	Add-on
ENSG00000203756	TMEM244	Add-on
ENSG00000073008	PVR	Add-on
ENSG00000172673	THEMIS	Add-on
ENSG00000167613	LAIR1	Add-on
ENSG00000123500	COL10A1	Add-on
ENSG00000060718	COL11A1	Add-on
ENSG00000099953	MMP11	Add-on
ENSG00000185920	PTCH1	Add-on
ENSG00000118785	SPP1	Add-on
ENSG00000109320	NFKB1	Add-on
ENSG00000173039	RELA	Add-on
ENSG00000038945	MSR1	Add-on
ENSG00000182492	BGN	Add-on
ENSG00000135404	CD63	Add-on
ENSG00000010278	CD9	Add-on
ENSG00000110651	CD81	Add-on
ENSG00000113916	BCL6	Add-on
ENSG00000196611	MMP1	Add-on
ENSG00000087494	PTHLH	Add-on
ENSG00000167779	IGFBP6	Add-on
ENSG00000065618	COL17A1	Add-on
ENSG00000117394	SLC2A1	Add-on
ENSG00000067225	PKM	Add-on
ENSG00000069011	PITX1	Add-on
ENSG00000073282	TP63	Add-on
ENSG00000091409	ITGA6	Add-on
ENSG00000019549	SNAI2	Add-on
ENSG00000164694	FNDC1	Add-on
ENSG00000172867	KRT2	Add-on
ENSG00000133110	POSTN	Add-on
ENSG00000115457	IGFBP2	Add-on
ENSG00000166670	MMP10	Add-on
ENSG00000134760	DSG1	Add-on
ENSG00000101311	FERMT1	Add-on
